# Supplementary material
Source: PubMed Central journal article supplement (PMC7685876)
Supplement: JCM.01813-20-s0001.pdf [file JCM.01813-20-s0001.pdf]

## Supplementary Tables:

Table S1: ENA accession codes for sequenced isolates in this study.

| Isolate                                                                                                                   | Run accession | Experiment Accession | Sample Accession | Study accession |
|---------------------------------------------------------------------------------------------------------------------------|---------------|----------------------|------------------|-----------------|
| <i>mabs1</i>                                                                                                              | ERR4298294    | ERX4247020           | ERS4787854       | ERP015597       |
| <i>mabs1_2</i>                                                                                                            | ERR4298330    | ERX4247056           | ERS4787890       | ERP015597       |
| <i>mabs2</i>                                                                                                              | ERR4298295    | ERX4247021           | ERS4787855       | ERP015597       |
| <i>mabs3</i>                                                                                                              | ERR4298297    | ERX4247023           | ERS4787857       | ERP015597       |
| <i>mabs3_2</i>                                                                                                            | ERR4298325    | ERX4247051           | ERS4787885       | ERP015597       |
| <i>mabs4</i>                                                                                                              | ERR4298298    | ERX4247024           | ERS4787858       | ERP015597       |
| <i>mabs4_2</i>                                                                                                            | ERR4298317    | ERX4247043           | ERS4787877       | ERP015597       |
| <i>mabs5</i>                                                                                                              | ERR4298300    | ERX4247026           | ERS4787860       | ERP015597       |
| <i>mabs5_2</i>                                                                                                            | ERR4298324    | ERX4247050           | ERS4787884       | ERP015597       |
| <i>mabs6</i>                                                                                                              | ERR4298302    | ERX4247028           | ERS4787862       | ERP015597       |
| <i>mabs7</i>                                                                                                              | ERR4298303    | ERX4247029           | ERS4787863       | ERP015597       |
| <i>mabs7_2</i>                                                                                                            | ERR4298319    | ERX4247045           | ERS4787879       | ERP015597       |
| <i>mabs8</i>                                                                                                              | ERR4298304    | ERX4247030           | ERS4787864       | ERP015597       |
| <i>mabs9</i>                                                                                                              | ERR4298305    | ERX4247031           | ERS4787865       | ERP015597       |
| <i>mabs10</i>                                                                                                             | ERR4298307    | ERX4247033           | ERS4787867       | ERP015597       |
| <i>mabs10_2</i>                                                                                                           | ERR4298323    | ERX4247049           | ERS4787883       | ERP015597       |
| <i>mabs11</i>                                                                                                             | ERR4298309    | ERX4247035           | ERS4787869       | ERP015597       |
| <i>mabs12</i>                                                                                                             | ERR4298310    | ERX4247036           | ERS4787870       | ERP015597       |
| <i>mabs13</i>                                                                                                             | ERR4298331    | ERX4247057           | ERS4787891       | ERP015597       |
| <i>mabs14</i>                                                                                                             | ERR4298312    | ERX4247038           | ERS4787872       | ERP015597       |
| <i>mabs15</i>                                                                                                             | ERR4298314    | ERX4247040           | ERS4787874       | ERP015597       |
| <i>mabs16</i>                                                                                                             | ERR4298322    | ERX4247048           | ERS4787882       | ERP015597       |
| <i>mabs16_2</i>                                                                                                           | ERR4298329    | ERX4247055           | ERS4787889       | ERP015597       |
| <i>mabs17</i>                                                                                                             | ERR4298318    | ERX4247044           | ERS4787878       | ERP015597       |
| <i>mabs17_2</i>                                                                                                           | ERR4298328    | ERX4247054           | ERS4787888       | ERP015597       |
| <i>mbol1</i>                                                                                                              | ERR4298296    | ERX4247022           | ERS4787856       | ERP015597       |
| <i>mbol2</i>                                                                                                              | ERR4298315    | ERX4247041           | ERS4787875       | ERP015597       |
| <i>mmas1</i>                                                                                                              | ERR4298293    | ERX4247019           | ERS4787853       | ERP015597       |
| <i>mmas1_2</i>                                                                                                            | ERR4298326    | ERX4247052           | ERS4787886       | ERP015597       |
| <i>mmas2</i>                                                                                                              | ERR4298299    | ERX4247025           | ERS4787859       | ERP015597       |
| <i>mmas3</i>                                                                                                              | ERR4298301    | ERX4247027           | ERS4787861       | ERP015597       |
| <i>mmas3_2</i>                                                                                                            | ERR4298327    | ERX4247053           | ERS4787887       | ERP015597       |
| <i>mmas4</i>                                                                                                              | ERR4298306    | ERX4247032           | ERS4787866       | ERP015597       |
| <i>mmas5</i>                                                                                                              | ERR4298308    | ERX4247034           | ERS4787868       | ERP015597       |
| <i>mmas6</i>                                                                                                              | ERR4298311    | ERX4247037           | ERS4787871       | ERP015597       |
| <i>mmas7</i>                                                                                                              | ERR4298313    | ERX4247039           | ERS4787873       | ERP015597       |
| <i>mmas8</i>                                                                                                              | ERR4298316    | ERX4247042           | ERS4787876       | ERP015597       |
| <i>mmas9</i>                                                                                                              | ERR4298320    | ERX4247046           | ERS4787880       | ERP015597       |
| <i>mmas10</i>                                                                                                             | ERR4298321    | ERX4247047           | ERS4787881       | ERP015597       |
| <i>mabs</i> : <i>M. abscessus</i> subsp. <i>abscessus</i> ; <i>mmas</i> : <i>M. abscessus</i> subsp. <i>massiliense</i> ; |               |                      |                  |                 |
| <i>mbol</i> : <i>M. abscessus</i> subsp. <i>bolletii</i>                                                                  |               |                      |                  |                 |

Table S2: Results of macrolide/aminoglycoside pDST and gDST (NTM-DR and WGS). Congruence of resistance prediction was 100%, while one isolate showed both WT and MUT reads of the *rrs* gene (*mabs12*).

| Isolate         | subspecies NTM-DR | <i>erm</i> (41) NTM-DR | <i>erm</i> (41) WGS | <i>erm</i> (41) WGS nucleotides | <i>rrl</i> -NTM-DR | <i>rrl</i> -WGS | pDSTM       | <i>rrs</i> NTM DR | <i>rrs</i> WGS | pDSTA       |
|-----------------|-------------------|------------------------|---------------------|---------------------------------|--------------------|-----------------|-------------|-------------------|----------------|-------------|
| <i>mabs1</i>    | <i>mabs</i>       | T28, functional        | T28                 | 522                             | WT                 | WT              | resistant   | WT                | WT             | susceptible |
| <i>mabs1_2</i>  | <i>mabs</i>       | T28, functional        | T28                 | 522                             | WT                 | WT              | resistant   | WT                | WT             | susceptible |
| <i>mabs2</i>    | <i>mabs</i>       | T28, functional        | T28                 | 522                             | WT                 | WT              | resistant   | WT                | WT             | susceptible |
| <i>mabs3</i>    | <i>mabs</i>       | T28, functional        | T28                 | 522                             | WT                 | WT              | resistant   | WT                | WT             | susceptible |
| <i>mabs3_2</i>  | <i>mabs</i>       | T28, functional        | T28                 | 522                             | WT                 | WT              | resistant   | WT                | WT             | susceptible |
| <i>mabs4</i>    | <i>mabs</i>       | T28, functional        | T28                 | 522                             | WT                 | WT              | resistant   | WT                | WT             | susceptible |
| <i>mabs4_2</i>  | <i>mabs</i>       | T28, functional        | T28                 | 522                             | WT                 | WT              | resistant   | WT                | WT             | susceptible |
| <i>mabs5</i>    | <i>mabs</i>       | T28, functional        | T28                 | 522                             | WT                 | WT              | resistant   | WT                | WT             | susceptible |
| <i>mabs5_2</i>  | <i>mabs</i>       | T28, functional        | T28                 | 522                             | WT                 | WT              | resistant   | WT                | WT             | susceptible |
| <i>mabs6</i>    | <i>mabs</i>       | T28, functional        | T28                 | 522                             | WT                 | WT              | resistant   | WT                | WT             | susceptible |
| <i>mabs7</i>    | <i>mabs</i>       | T28, functional        | T28                 | 522                             | WT                 | WT              | resistant   | WT                | WT             | susceptible |
| <i>mabs7_2</i>  | <i>mabs</i>       | T28, functional        | T28                 | 522                             | WT                 | WT              | resistant   | WT                | WT             | susceptible |
| <i>mabs8</i>    | <i>mabs</i>       | T28, functional        | T28                 | 522                             | WT                 | WT              | resistant   | WT                | WT             | susceptible |
| <i>mabs9</i>    | <i>mabs</i>       | T28, functional        | T28                 | 522                             | WT                 | WT              | resistant   | WT                | WT             | susceptible |
| <i>mabs10</i>   | <i>mabs</i>       | T28, functional        | T28                 | 522                             | WT                 | WT              | resistant   | WT                | WT             | susceptible |
| <i>mabs10_2</i> | <i>mabs</i>       | T28, functional        | T28                 | 522                             | WT                 | WT              | resistant   | WT                | WT             | susceptible |
| <i>mabs11</i>   | <i>mabs</i>       | T28, functional        | T28                 | 522                             | WT                 | WT              | resistant   | WT                | WT             | susceptible |
| <i>mabs12</i>   | <i>mabs</i>       | T28, functional        | T28                 | 522                             | WT                 | WT              | resistant   | MUT1              | MUT1*          | resistant   |
| <i>mabs13</i>   | <i>mabs</i>       | T28, functional        | T28                 | 522                             | WT                 | WT              | resistant   | WT                | WT             | susceptible |
| <i>mabs14</i>   | <i>mabs</i>       | T28, functional        | T28                 | 522                             | WT                 | WT              | resistant   | WT                | WT             | susceptible |
| <i>mabs15</i>   | <i>mabs</i>       | T28, functional        | T28                 | 522                             | WT                 | WT              | resistant   | WT                | WT             | susceptible |
| <i>mabs16</i>   | <i>mabs</i>       | T28, functional        | T28                 | 522                             | WT                 | WT              | resistant   | WT                | WT             | susceptible |
| <i>mabs16_2</i> | <i>mabs</i>       | T28, functional        | T28                 | 522                             | WT                 | WT              | resistant   | WT                | WT             | susceptible |
| <i>mabs17</i>   | <i>mabs</i>       | T28, functional        | T28                 | 522                             | WT                 | WT              | resistant   | WT                | WT             | susceptible |
| <i>mabs17_2</i> | <i>mabs</i>       | T28, functional        | T28                 | 522                             | WT                 | WT              | resistant   | MUT1              | MUT1           | resistant   |
| <i>mbol1</i>    | <i>mbol</i>       | T28, functional        | T28                 | 522                             | WT                 | WT              | resistant   | WT                | WT             | susceptible |
| <i>mbol2</i>    | <i>mbol</i>       | T28, functional        | T28                 | 522                             | WT                 | WT              | resistant   | WT                | WT             | susceptible |
| <i>mmas1</i>    | <i>mmas</i>       | T28, truncated         | T28                 | 263                             | MUT4               | MUT4            | resistant   | WT                | WT             | susceptible |
| <i>mmas1_2</i>  | <i>mmas</i>       | T28, truncated         | T28                 | 263                             | MUT4               | MUT4            | resistant   | WT                | WT             | susceptible |
| <i>mmas2</i>    | <i>mmas</i>       | T28, truncated         | T28                 | 263                             | WT                 | WT              | susceptible | WT                | WT             | susceptible |
| <i>mmas3</i>    | <i>mmas</i>       | T28, truncated         | T28                 | 263                             | WT                 | WT              | susceptible | WT                | WT             | susceptible |
| <i>mmas3_2</i>  | <i>mmas</i>       | T28, truncated         | T28                 | 263                             | WT                 | WT              | susceptible | WT                | WT             | susceptible |
| <i>mmas4</i>    | <i>mmas</i>       | T28, truncated         | T28                 | 263                             | WT                 | WT              | susceptible | WT                | WT             | susceptible |
| <i>mmas5</i>    | <i>mmas</i>       | T28, truncated         | T28                 | 263                             | WT                 | WT              | susceptible | WT                | WT             | susceptible |
| <i>mmas6</i>    | <i>mmas</i>       | T28, truncated         | T28                 | 260                             | WT                 | WT              | susceptible | WT                | WT             | susceptible |
| <i>mmas7</i>    | <i>mmas</i>       | T28, truncated         | T28                 | 263                             | WT                 | WT              | susceptible | WT                | WT             | susceptible |
| <i>mmas8</i>    | <i>mmas</i>       | T28, truncated         | T28                 | 260                             | WT                 | WT              | susceptible | WT                | WT             | susceptible |
| <i>mmas9</i>    | <i>mmas</i>       | T28, truncated         | T28                 | 263                             | WT                 | WT              | susceptible | WT                | WT             | susceptible |
| <i>mmas10</i>   | <i>mmas</i>       | T28, truncated         | T28                 | 263                             | WT                 | WT              | susceptible | WT                | WT             | susceptible |

*rrl* MUT4: A2059G; *rrs* MUT1: A1408G; WT: wild type; *mabs*: *M. abscessus* subsp. *abscessus*; *mmas*: *M. abscessus* subsp. *massiliense*; *mbol*: *M. abscessus* subsp. *bolletii*

pDSTM: phenotypic drug susceptibility testing of macrolides; pDSTA: phenotypic drug susceptibility testing of aminoglycosides

\*48 reads WT, 24 reads MUT1

Table S3: Table showing a comparison between full phylogenetic analysis and cluster analysis for the corresponding clusters. In all clusters there was a much higher usage of the reference genome in the cluster analysis. In *mmas*, SNP difference and SNP ratio between both analyses were significantly larger than in *mabs*.

| Analysed cluster                       | Size of reference genome |                  | Usage of reference genome |                  | Median SNP distance |                  | Analyses comparison               |                       |
|----------------------------------------|--------------------------|------------------|---------------------------|------------------|---------------------|------------------|-----------------------------------|-----------------------|
|                                        | full analysis            | cluster analysis | full analysis             | cluster analysis | full analysis       | cluster analysis | SNP difference<br>(median, range) | SNP-ratio<br>(median) |
| <b>M. abscessus subsp. abscessus</b>   |                          |                  |                           |                  |                     |                  |                                   |                       |
| <i>mabs_d25_cluster1</i>               | 5067172                  | 5237165          | 88,57%                    | 99,70%           | 10 (4-14)           | 11 (6-15)        | 1 (1-2)                           | 1,22                  |
| <i>mabs_d25_cluster2</i>               | 5067172                  | 5135369          | 88,57%                    | 99,17%           | 21.5 (13-32)        | 28 (17-37)       | 5.5 (2-10)                        | 1,32                  |
| <i>mabs_d25_cluster3</i>               | 5067172                  | 5164744          | 88,57%                    | 99,71%           | 24 (13-35)          | 42 (22-67)       | 19 (6-35)                         | 1,7                   |
| <b>M. abscessus subsp. massiliense</b> |                          |                  |                           |                  |                     |                  |                                   |                       |
| <i>mmas_d25_cluster1</i>               | 5067172                  | 5118935          | 85,53%                    | 99,63%           | 14 (6-32)           | 33 (8-74)        | 22 (2-42)                         | 2,33                  |
| <i>mmas_d25_cluster2</i>               | 5067172                  | 4899047          | 85,53%                    | 99,60%           | 11                  | 15               | 4                                 | 1,36                  |
| <i>mmas_d25_cluster3</i>               | 5067172                  | 4960781          | 85,53%                    | 99,79%           | 17                  | 55               | 38                                | 3,23                  |

Supplementary Figures:

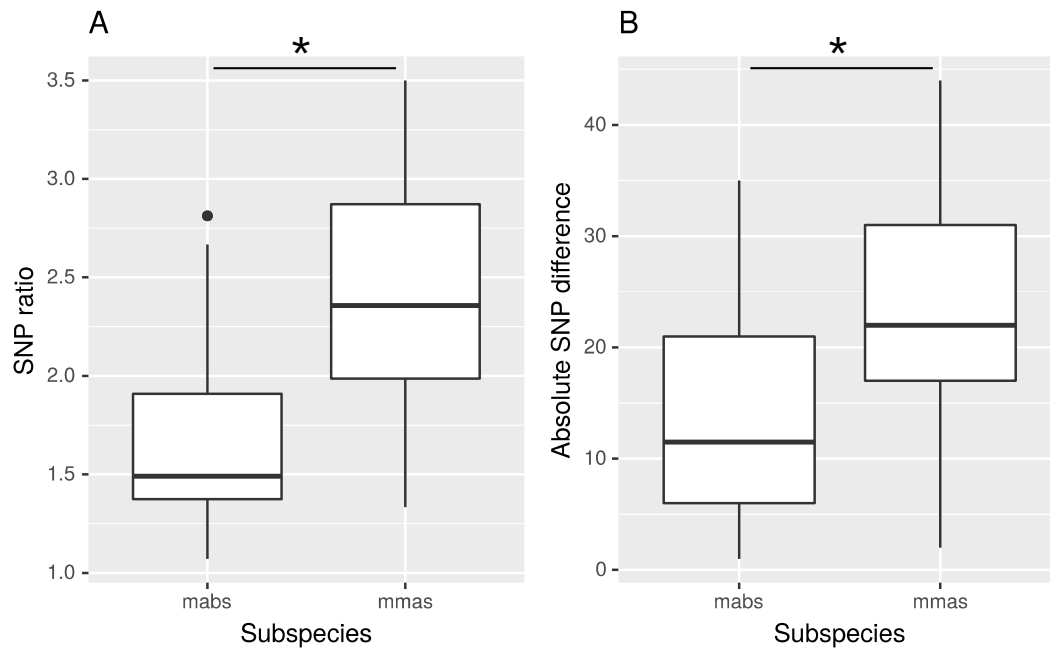

Figure S1: SNP ratio and absolute SNP difference between full and cluster analyses in mabs and mmas. (A) SNP ratio was significantly larger in mmas, as was absolute SNP difference (B).
